# Supplementary material for: Metal coordination to solute binding proteins – exciting chemistry with potential biological meaning
Source: Royal Society of Chemistry journal article supplement (doi:10.1039/d3dt02417b), 2023-01-01
Supplement: d3dt02417b1.pdf [file d3dt02417b1.pdf]

## **Metal coordination to solute binding proteins – exciting chemistry with potential biological meaning**

Kinga Garstka,<sup>a</sup> Denise Bellotti,<sup>a, b</sup> Joanna Wątyły,<sup>a</sup> Aleksandra Hecel,<sup>a</sup> Henryk Kozłowski,<sup>a, c</sup> Maurizio Remelli<sup>b</sup> and Magdalena Rowińska-Żyrek<sup>a\*</sup>

---

<sup>a</sup> Faculty of Chemistry, University of Wrocław, F. Joliot-Curie 14, 50-383 Wrocław, Poland. E-mail: magdalena.rowinska-zyrek@chem.uni.wroc.pl

<sup>b</sup> Department of Chemical and Pharmaceutical Sciences, University of Ferrara, Via Fossato di Mortara 17, 44121 Ferrara, Italy

<sup>c</sup> Institute of Health Sciences, University of Opole, Katowicka 68 St, 45-060 Opole, Poland

Mass spectrometry confirmed peptide purity and showed that they form mononuclear complexes with Zn(II) and Ni(II) (Fig. S1, Fig. S2 and Fig.S3, ESI<sup>+</sup>).

The signals:  $m/z = 776.30$ ,  $z = 3+$ ;  $m/z = 1131.92$ ,  $z = 4+$  and  $m/z = 914.44$ ,  $z = 2+$  correspond to the free ligand for the Ac-HEHEHEHEHEHEHEHEH-NH<sub>2</sub> - ZnuA-(120-136), Ac-GGEHEHEHEHEHEHEHEHDGHHGHAEEQAHHDDHDSG-NH<sub>2</sub> - ZnuA-(117-133), and Ac-GGGHYHYIDGKAVFHAG-NH<sub>2</sub> - AztC-(117-133), respectively. The assignment peaks were compared to simulated isotopic patterns, which fit perfectly to experimental data (Fig. S1-3, ESI<sup>+</sup>). In all measured mass spectra, the signals corresponding to the sodium and potassium adducts of free ligands were observed.

In the mass spectra of Zn(II)-ZnuA-(120-136) (Fig. S1A, ESI<sup>+</sup>) beside the signals from the ligand and its sodium and potassium adducts, we observe a signals which comes from the zinc complex ( $m/z = 797.27$ ,  $z = 3+$ ) and its sodium ( $m/z = 804.59$ ,  $z = 3+$ ), chloride ( $m/z = 809.62$ ,  $z = 3+$ ), sodium and one chloride ( $m/z = 816.61$ ,  $z = 3+$ ), potassium ( $m/z = 821.98$ ,  $z = 3+$ ) and potassium and sodium ( $m/z = 842.60$ ,  $z = 3+$ ) adducts. In the case of Ni(II)-ZnuA-(120-136) (Fig. S1B, ESI<sup>+</sup>) the signal ( $m/z = 794.93$ ,  $z = 3+$ ) correspond to the equimolar Ni(II) complex. In these spectra also the sodium ( $m/z = 802.26$ ,  $z = 3+$ ); ( $m/z = 808.95$ ,  $z = 3+$ ) adducts of the nickel peptide are present and the signals correspond to adducts with one sodium atom and two potassium atoms.

In the Zn(II)-ZnuA-(117-133) spectra, aside from the signals which comes from the free ligand and its adducts, a equimolar Zn(II) complex ( $m/z = 1147.90$ ,  $z = 4+$ ), its different adducts can be observed (Fig. S2A, ESI<sup>+</sup>). In the spectra of the same ligand with Ni(II) (Fig. S2B, ESI<sup>+</sup>), the signals can be assigned to the nickel complex ( $m/z = 1146.16$ ,  $z = 4+$ ) and a nickel complex with a sodium adduct ( $m/z = 1151.91$ ,  $z = 4+$ ), potassium adduct ( $m/z = 1156.41$ ,  $z = 4+$ ) and sodium chloride adduct ( $m/z = 1166.18$ ,  $z = 4+$ ).

In the case of Zn(II)-AztC-(117-133) mass spectra (Fig. S3A, ESI<sup>+</sup>) the prevailing signals correspond to the Zn(II) complex ( $m/z = 945.90$ ,  $z = 2+$ ), its sodium adducts ( $m/z = 955.89$ ,  $z = 2+$ ) and its potassium adducts ( $m/z = 964.88$ ,  $z = 2+$ ). In the Ni(II)-AztC-(117-133) spectra (Fig. S3B, ESI<sup>+</sup>) the signals which come from Ni(II) complex ( $m/z = 942.40$ ,  $z = 2+$ ), its sodium adducts ( $m/z = 953.39$ ,  $z = 2+$ ) and potassium adducts ( $m/z = 961.38$ ,  $z = 2+$ ) are observed.

Figure 1. ESI-MS spectrum of A) Zn(II)-ZnuA-(120-136) - M(II)/L molar ratio= 0.5 : 1; B) Ni(II)-ZnuA-(120-136) -

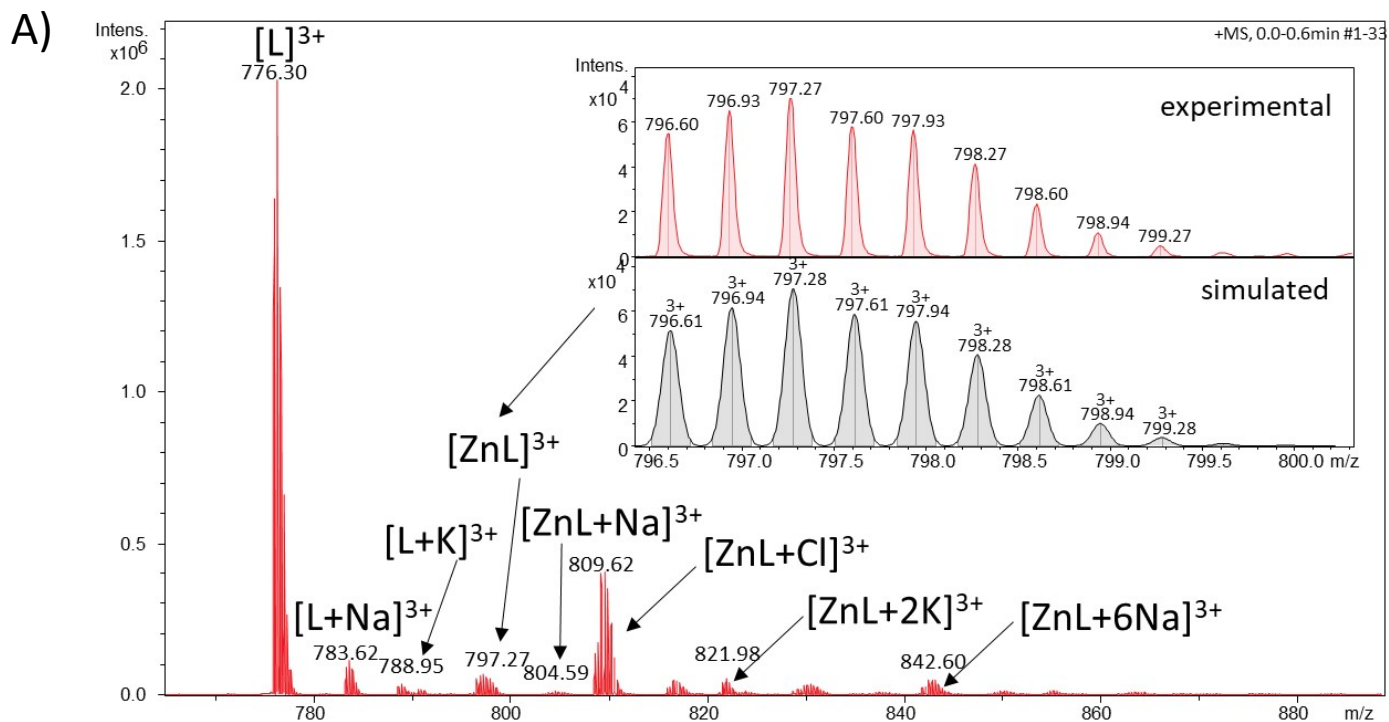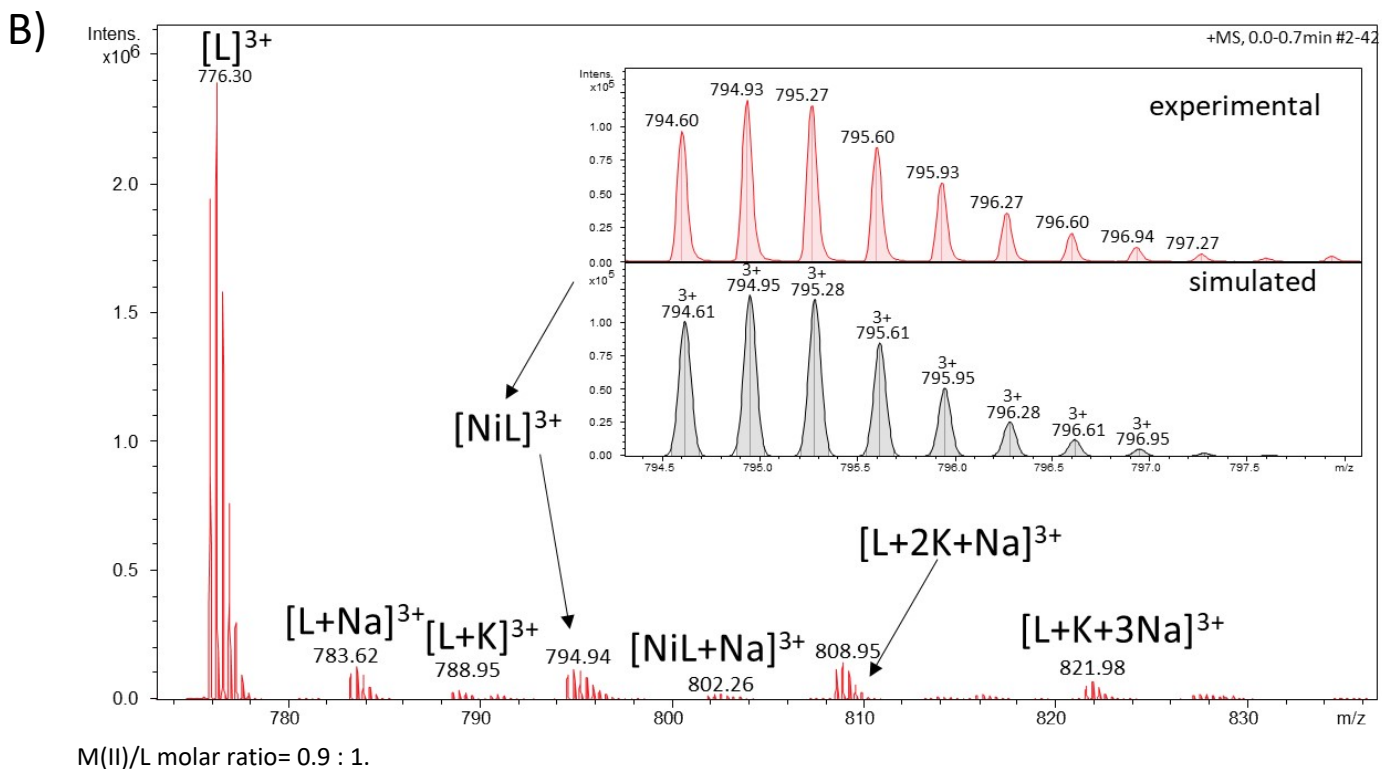

Figure 2. ESI-MS spectrum of A) Zn(II)-ZnuA-(117-133) - M(II)/L molar ratio= 0.5 :1; B) Ni(II)-ZnuA-(117-133)- M(II)/L molar ratio= 0.9 : 1.

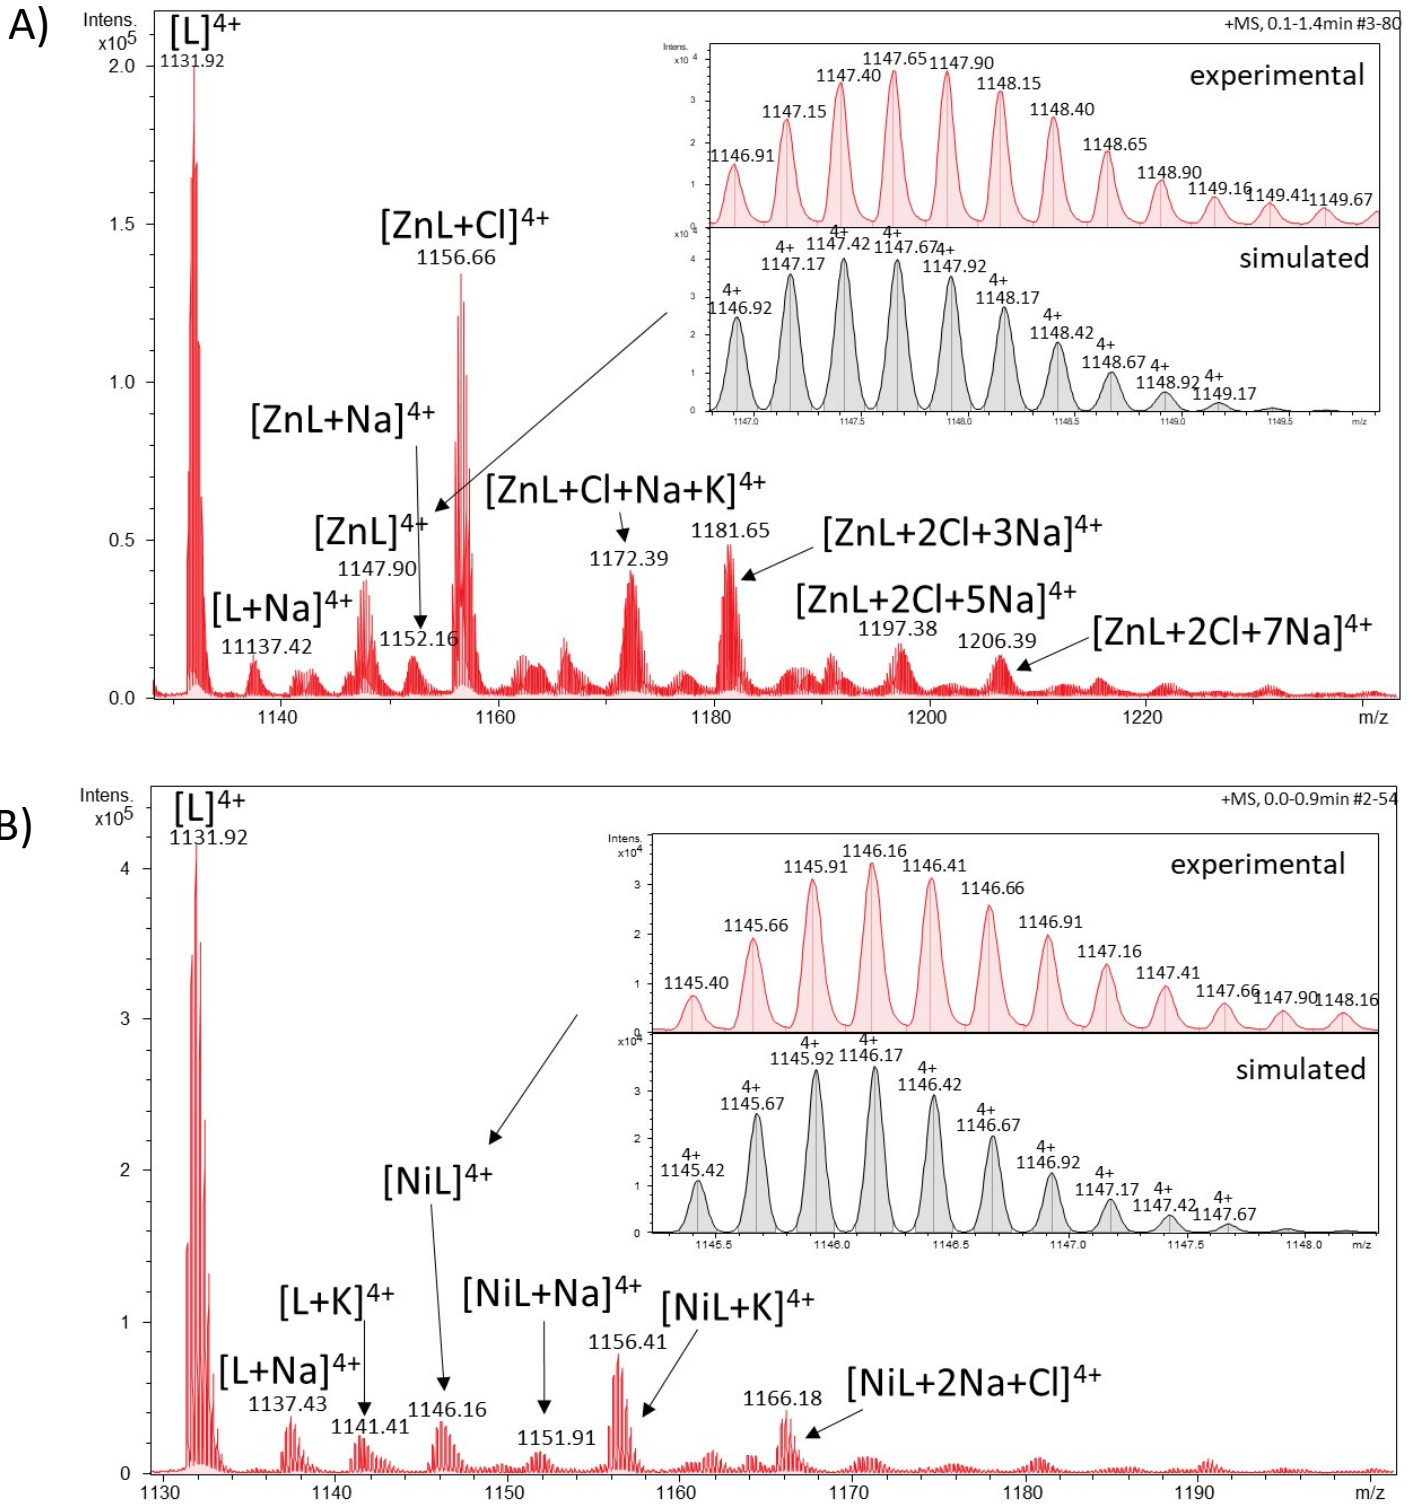

Figure 3. ESI-MS spectrum of A) Zn(II)-AztC-(117-133); B) Ni(II)-AztC-(117-133); M(II)/L molar ratio= 0.9 : 1.

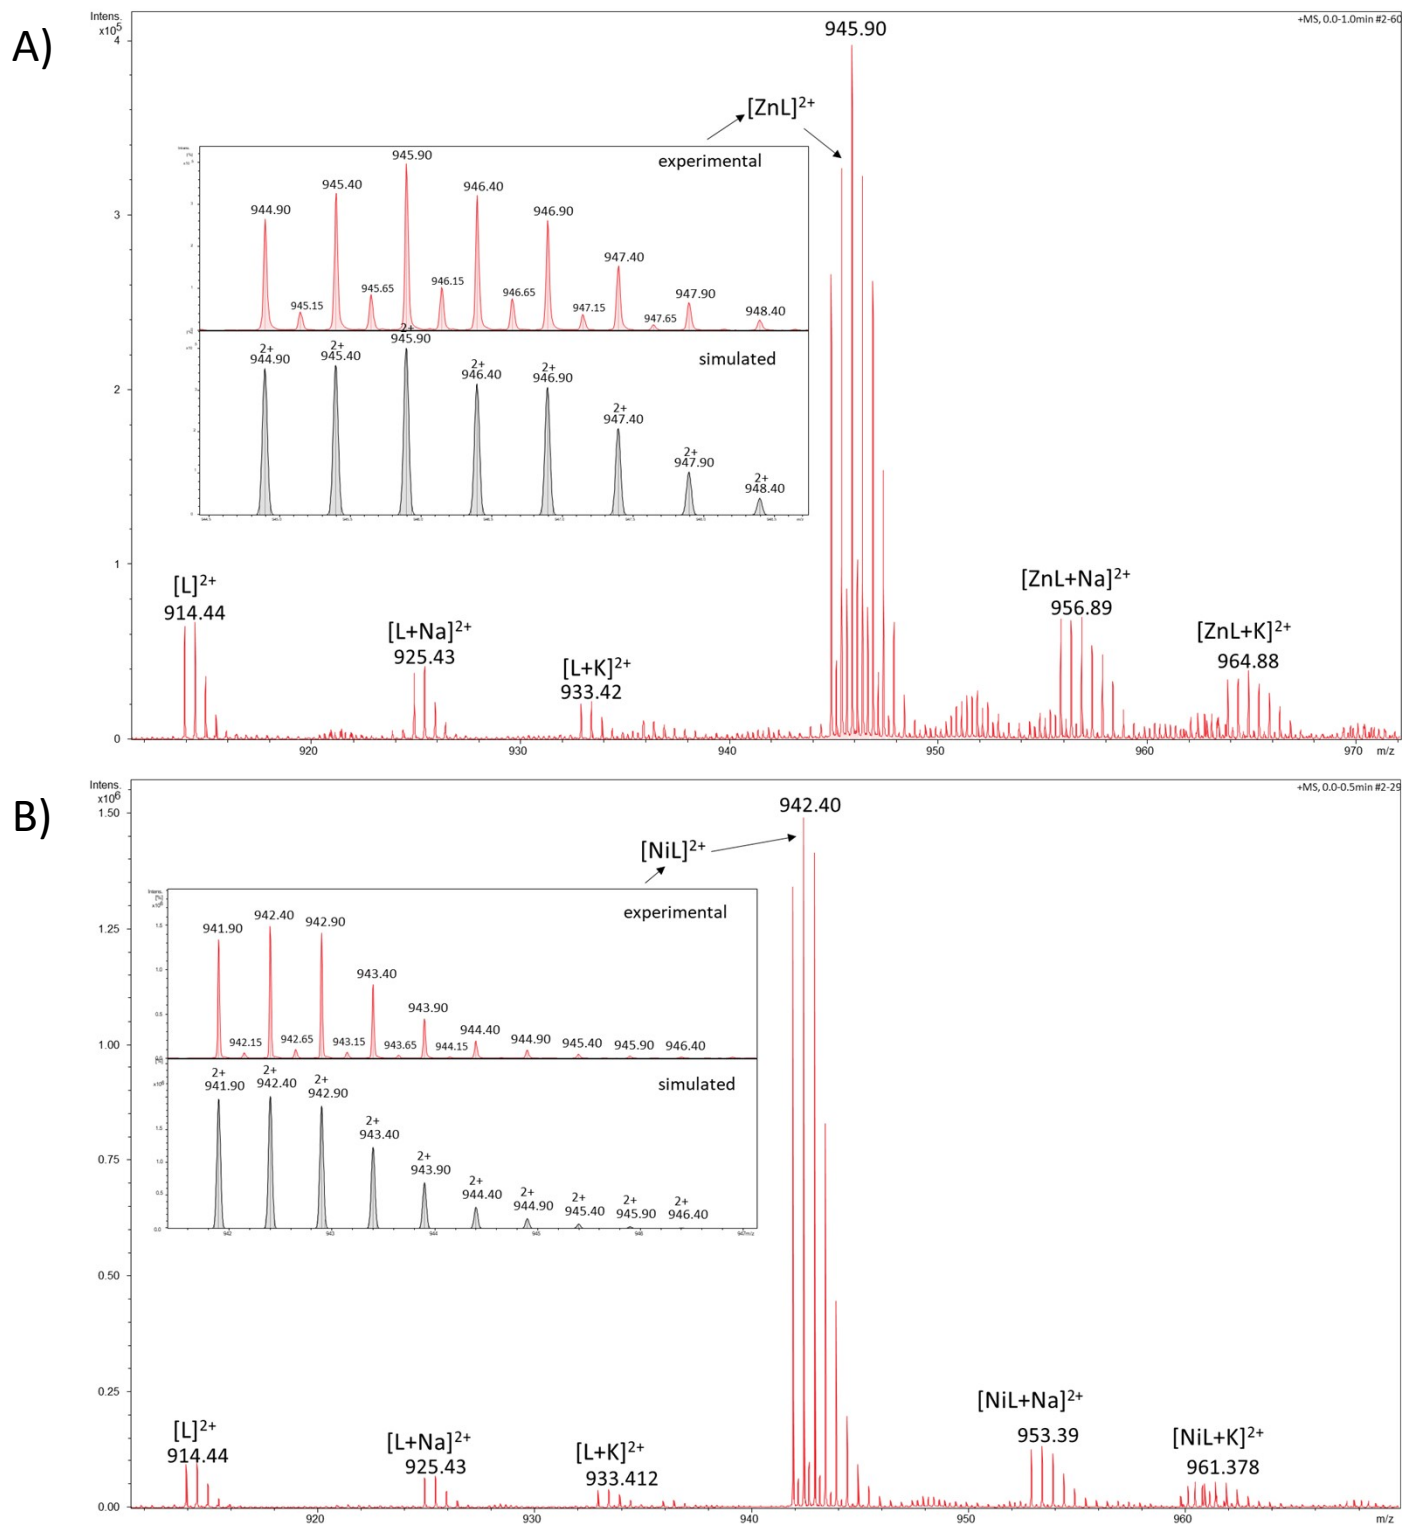

Figure 4. Species distribution diagrams for the formation of A) Zn(II) complexes with the ZnuA-(120-136) fragment; B) Zn(II) complexes with the ZnuA-(117-133) fragment, T=298 K; I=0.1 M; [L]=0.0005 M; M(II)/L molar ratio=0.5 : 1; C) Zn(II) complexes with the AztC-(117-133) fragment; T=298 K; I=0.1 M; [L]=0.0005 M; M(II)/L molar ratio=0.9 : 1.

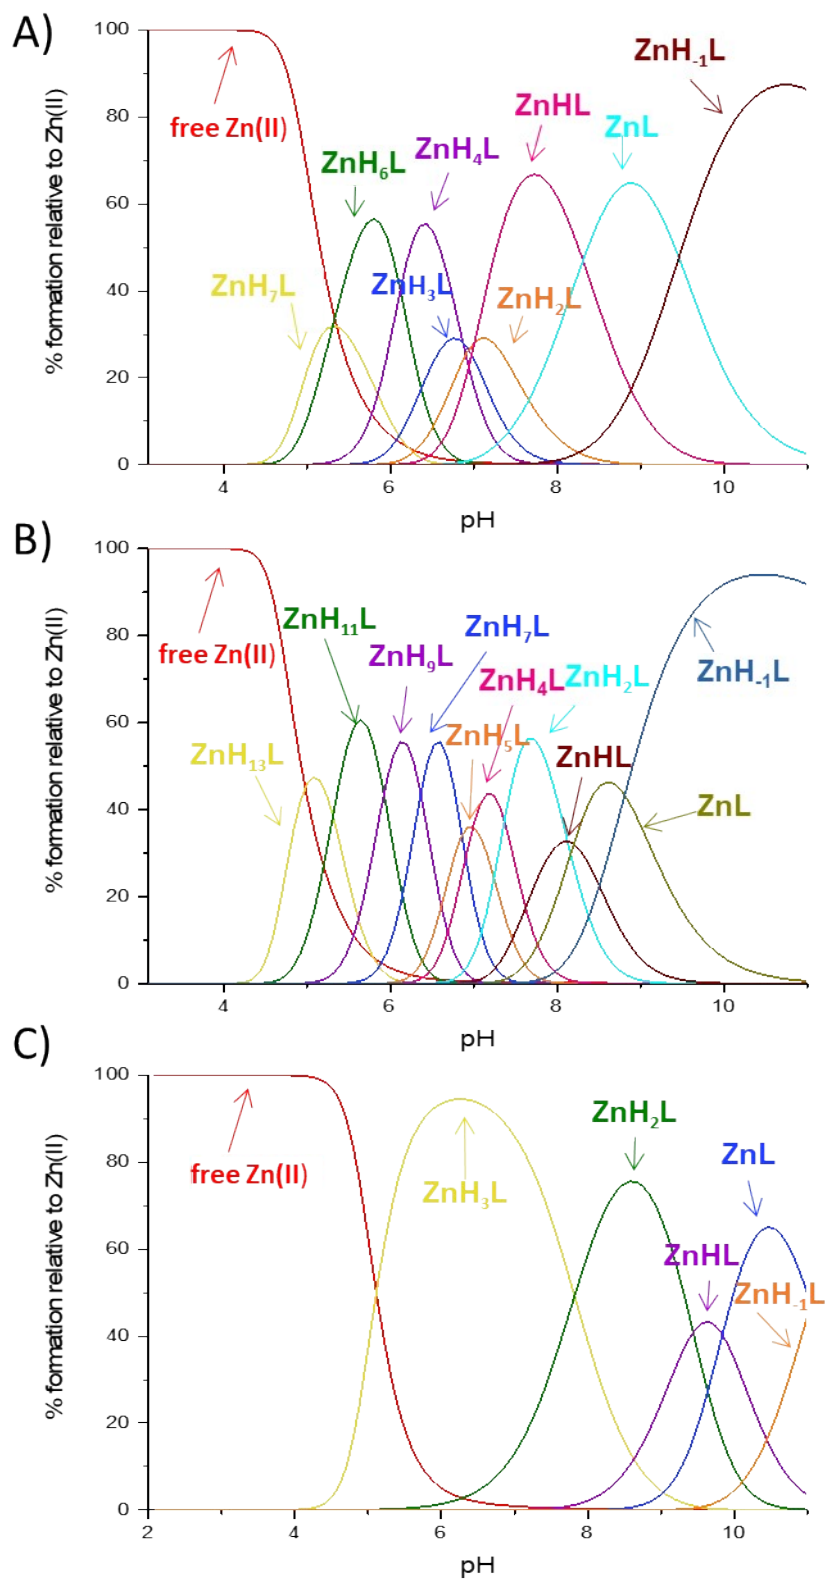

Figure 5. Distribution diagrams for the formation of A) Ni(II) complexes with the ZnuA-(120-136) fragment; B) Ni(II) complexes with the ZnuA-(117-133) fragment, T=298 K; I=0.1 M; [L]=0.0005 M; M(II)/L molar ratio=0.5 : 1; C) Ni(II) complexes with the AztC-(117-133)fragment; T=298 K; I=0.1 M; [L]=0.0005 M; M(II)/L molar ratio=0.9 : 1.

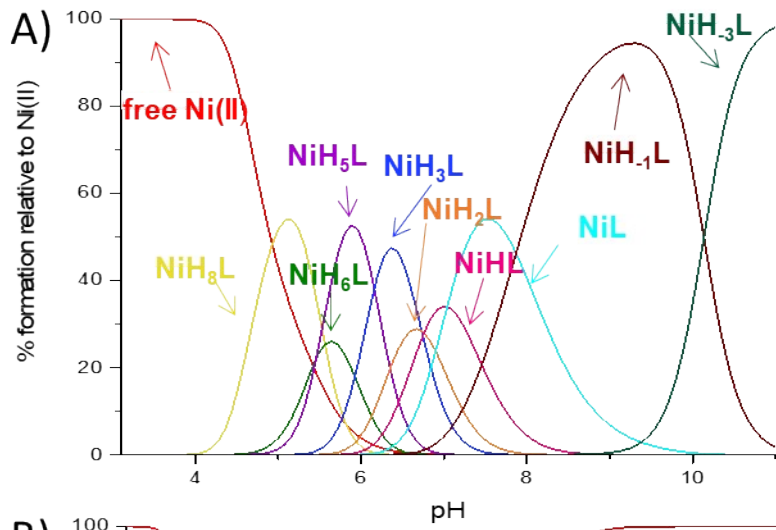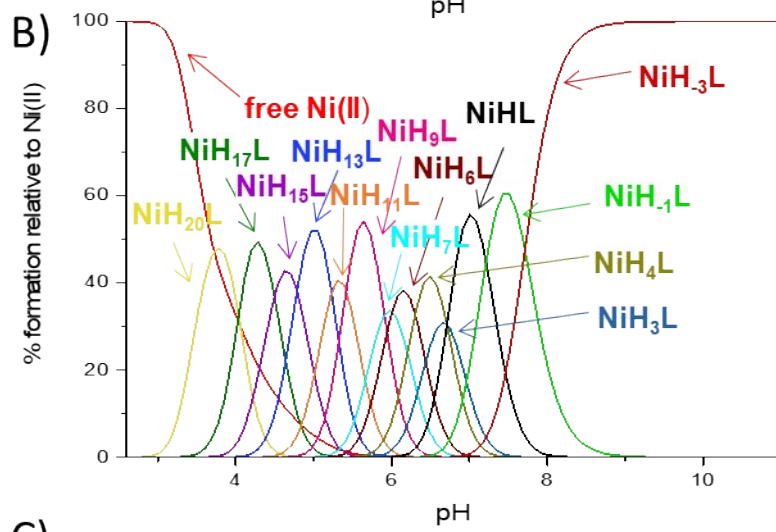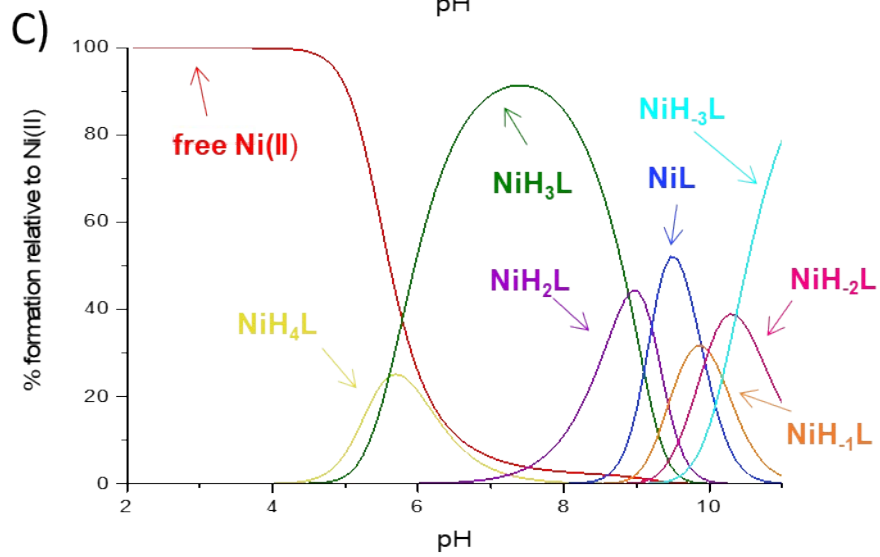



Figure 6. UV-Vis spectra of Ni(II) complexes with A) the ZnuA-(120-136) fragment; B) the ZnuA-(117-133) fragment, T=298 K; l=0.1 M; [L]=0.0005 M; M(II)/L molar ratio=0.5 : 1; C) the AztC-(117-133) fragment in the range 300-700 nm and pH range 3.0-11.0; T=298 K; optical path=1 cm; [L]=0.0005 M; M(II)/L=0.9 : 1.

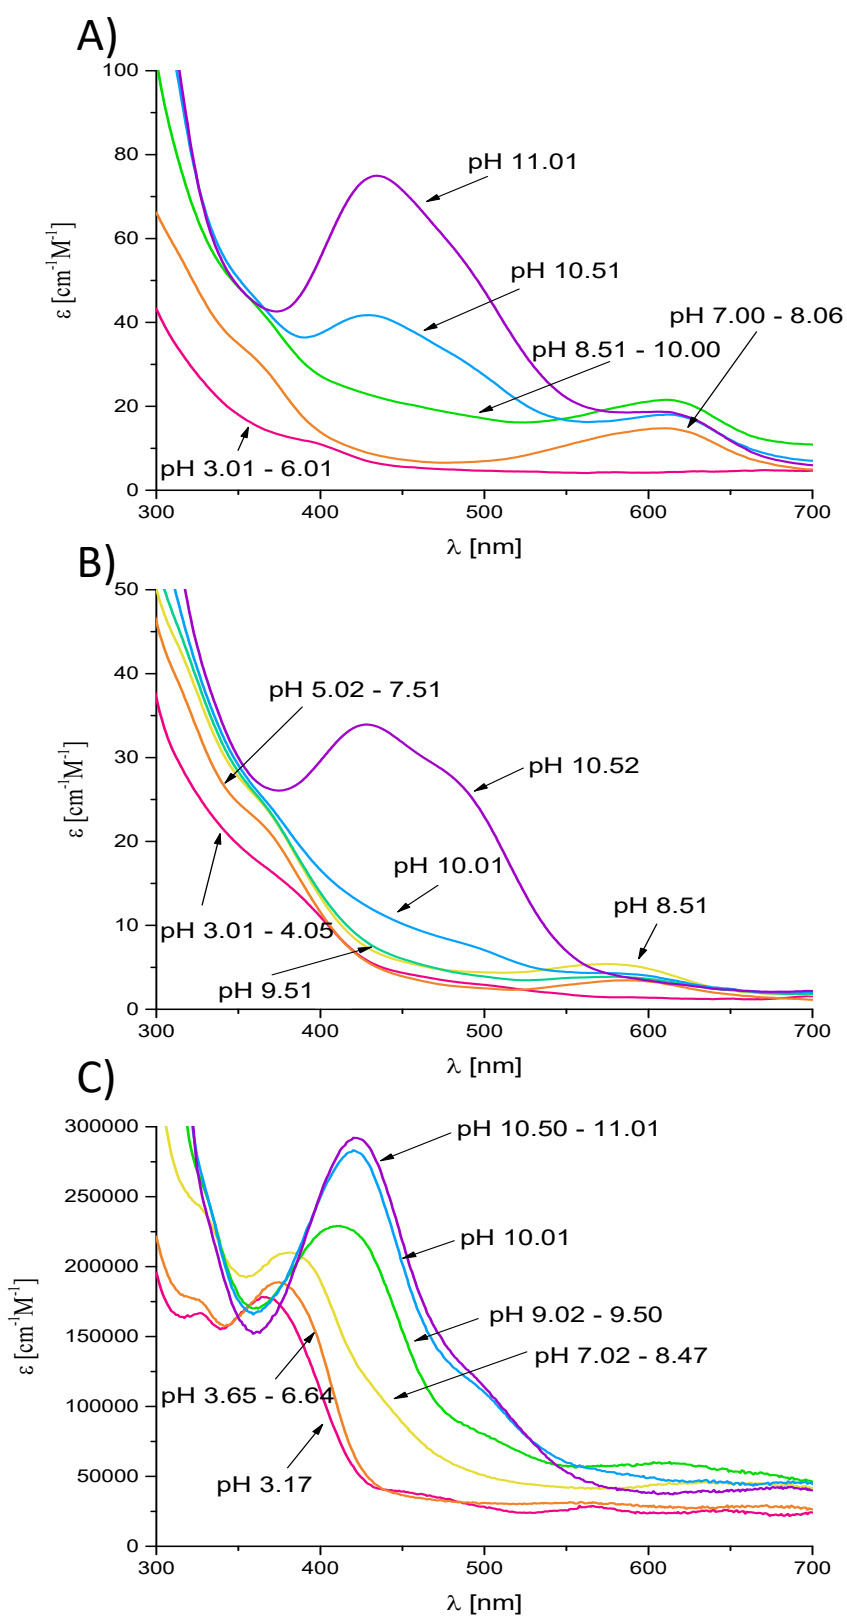

Figure 7. CD spectra of Ni(II) complexes with A) the ZnuA-(120-136) fragment; B) the ZnuA-(117-133) fragment, T=298 K; I=0.1 M; [L]=0.0005 M; M(II)/L molar ratio=0.5 : 1; C) the AztC-(117-133) fragment in the range 250-650 nm and pH range 3.5-11.0; T=298 K; optical path=1 cm; [L]=0.0005 M; M(II)/L=0.9 : 1.

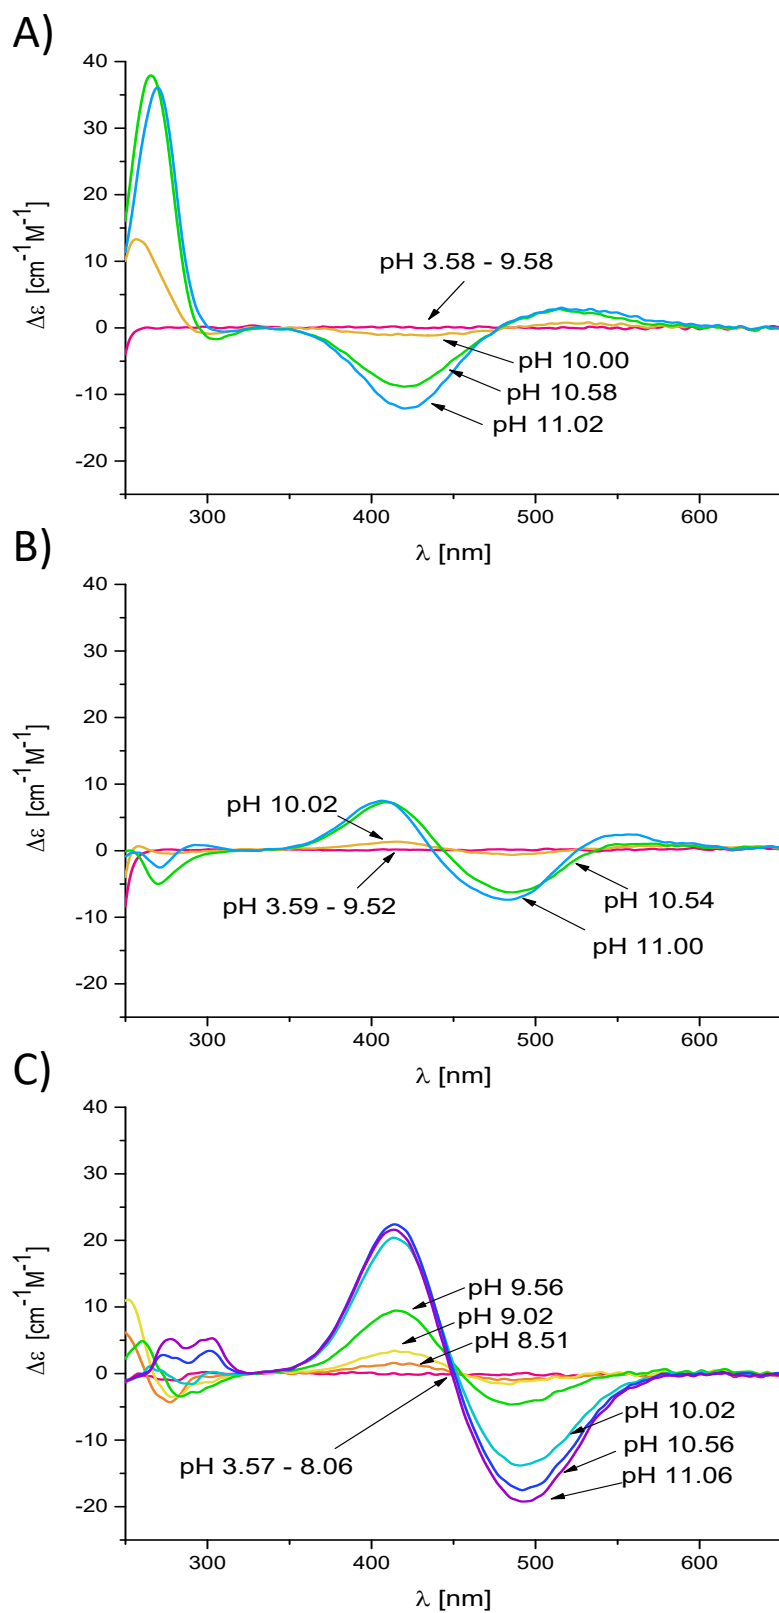

Figure 8. Proposed binding mode for A) Zn(II)-AztC-(117-133) and B) Ni(II)-AztC-(117-133) at physiological pH, pH 7.4, generated by PyMOL [1].

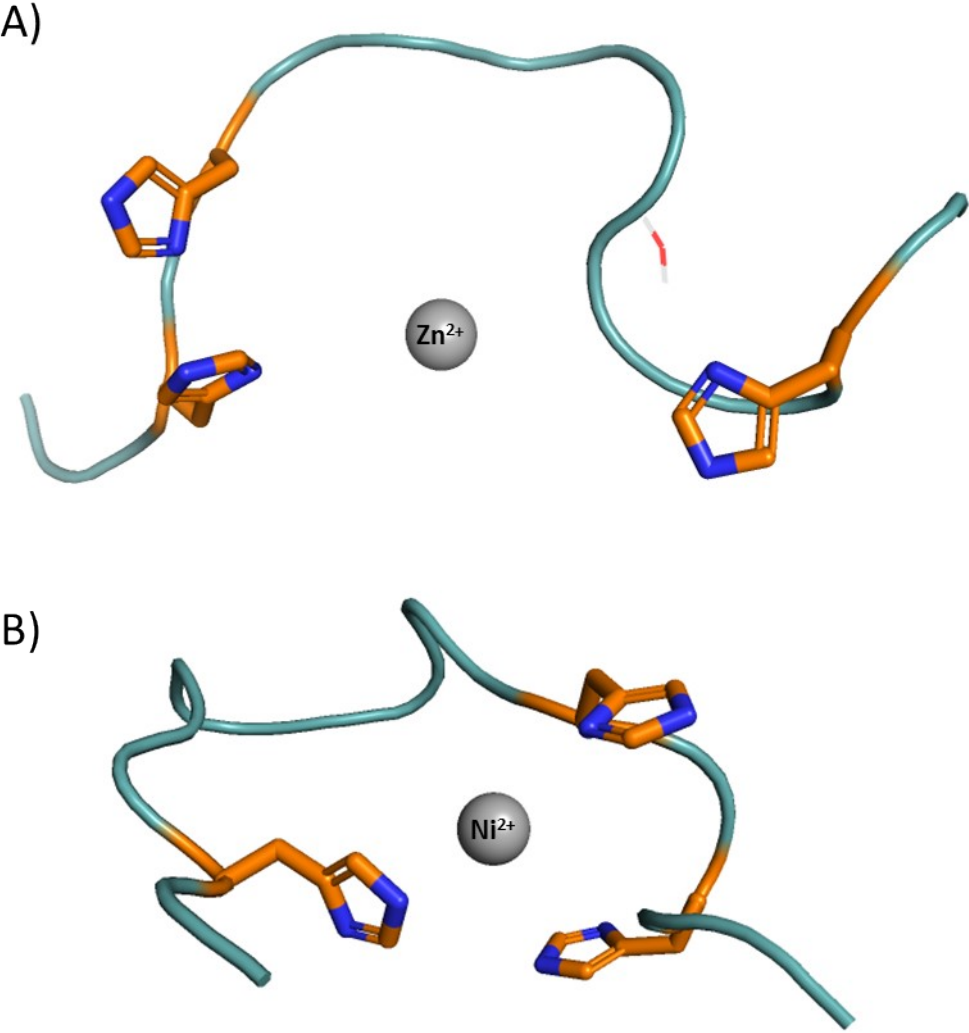

Figure 9. Competition plot between A) ZnuA-(120-136), B) ZnuA-(117-133), C) AztC-(117-133), Zn(II) and Ni(II), describes complex formation at different pH values in a hypothetical situation in which equimolar amounts of the three reagents are mixed. Calculations are based on binding constants from Table 1.

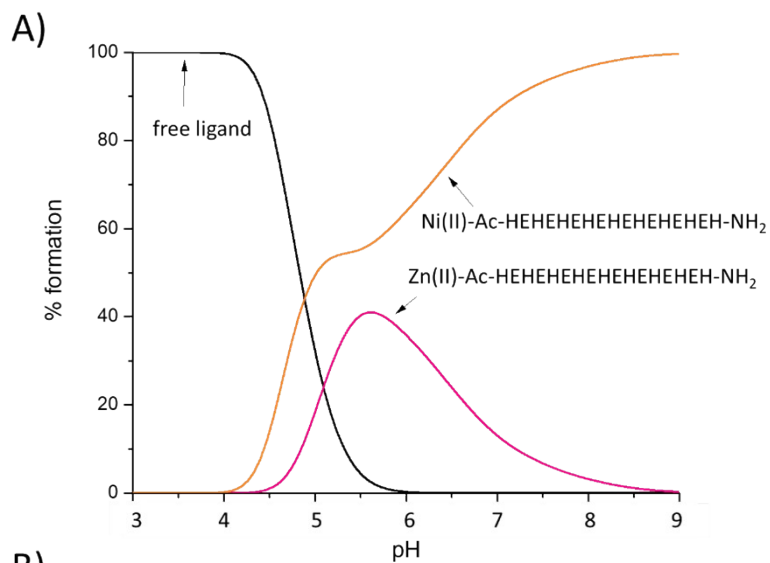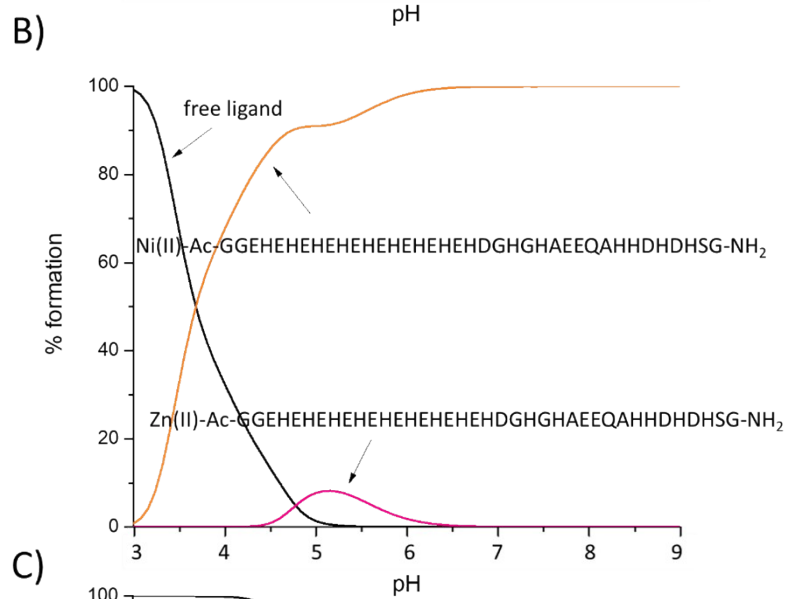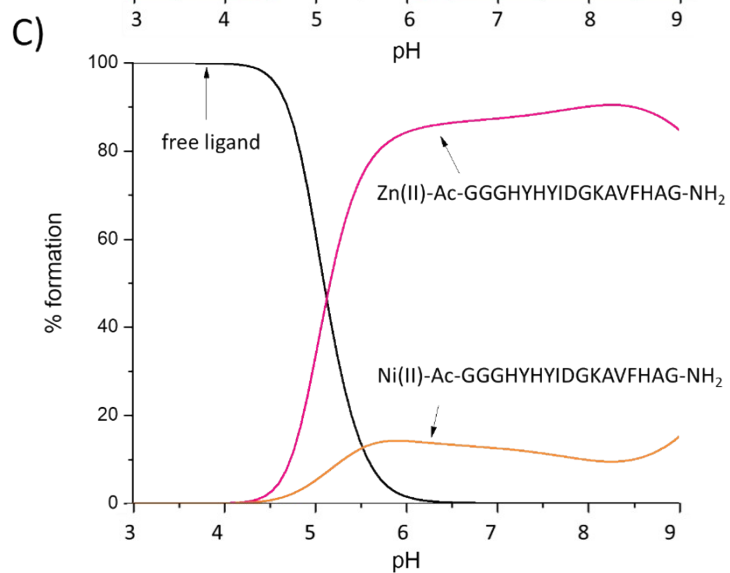

References:

[1] L. Alderighi, P. Gans, A. Ienco, d. Peters, A. Sabatini and A. Vacca. *Coordination Chemistry Reviews* 1999; 184:311-318
